# Supplementary material for: Structural and functional divergence of the Mpc1 genes in wheat and barley
Source: PubMed Central journal article supplement (PMC6391766; doi:10.1186/s12862-019-1378-3), 2019-02-26
Supplement: 12862_2019_1378_MOESM1_ESM.pdf [file 12862_2019_1378_MOESM1_ESM.pdf]

# Additional file 1.

A. The exon-intronic structure for *Mpc1* genes of Triticeae tribe.

B. The multiple sequence alignment of promotor sequences of *HvMpc1-H3*. The alignment was performed using MultAlin program. Red is high consensus colour, blue is low consensus colour, black is neutral colour.

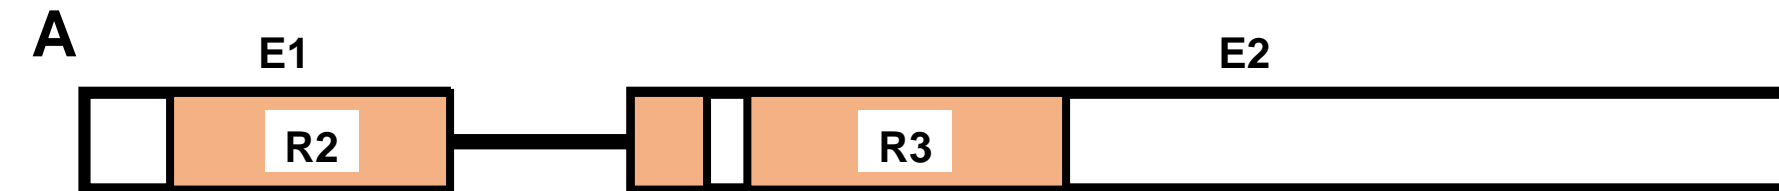

**B**

|                      |            |            |            |            |            |            |            |            |            |            |            |            |            |
|----------------------|------------|------------|------------|------------|------------|------------|------------|------------|------------|------------|------------|------------|------------|
|                      | 1          |            |            |            |            |            |            |            |            |            |            |            | 130        |
| <i>HvMpc1-H3-BW</i>  | ACTGCACGGA | CCTGCTGCTA | TCGAGATAGG | ACGAGGAGGT | TAGCCACGAG | CGTATCTGAG | ACTGGGAGAC | GAACCACGCG | TAGCAGCAGA | GCACTAGCTC | -----      | -----ATG   | GCCCCGCGAT |
| <i>HvMpc1-H3-BA</i>  | ACTGCACGGA | CCTGCTGCTA | TCGAGATAGG | ACGAGGAGGT | TAGCCACGAG | GGTATCTGAG | ACTGGGAGAC | GAACCACGCG | TAGCAGCAGA | GCACTAGCTC | -----      | -----ATG   | GCCCCGCGAT |
| <i>HvMpc1-H3-PLP</i> | ACTGCACGGA | CCTGCTGCTA | TCGAGATAGG | ACGAGGAGGT | TAGCCACGAG | CGTATCTGAG | ACTGGGAGAC | GAACCACGCG | TAGCAGCAGA | GCACTAGCTC | -----      | -----ATG   | GCCCCGCGTT |
| <i>HvMpc1-H3-DOM</i> | ACTGCACGGA | CCTGCTGCTA | TCGAGATAGG | ACGAGGAGGT | TAGCCACGAG | CGTATCTGAG | ACTGGGAGAC | GAACCACGCG | TAGCAGCAGA | GCACTAGCTC | -----      | -----ATG   | GCCCCGCGAT |
| <i>HvMpc1-H3-REC</i> | ACTGCACGGA | CCTGCTGCTA | TCGAGATAGG | ACGAGGAGGT | TAGCCACGAG | CGTATCTGAG | ACTGGGAGAC | GAACCACGCG | TAGCAGCAGA | GCACTAGCTC | CAGCAGAGCA | CTAGCTCATG | GCCCCGCGAT |
|                      | 131        |            |            |            |            |            |            |            |            |            |            |            | 260        |
| <i>HvMpc1-H3-BW</i>  | TCCATGCAAC | CGAGAGTCCA | GGTCCTGCGC | CCCAACACGC | TACGCCTAGA | GGAGTCGCCA | CCGCTATCTT | TCCAGACCAG | GTGCGAGAGA | TCGTAGGGGG | CCTAACGAGC | TGAAGTATTG | GATCCGGGTA |
| <i>HvMpc1-H3-BA</i>  | TCCATGCAAC | CGAGAGTCCA | GGTCCTGCGC | CCCAACACGC | TACGCCTGGA | GGAGTCGCCA | CCGCTATCTT | TCCAGACCAG | GTGCGAGAGA | TCGTAGGGGG | CCTAACGAGC | TGAAGTATTG | GATCCGGGTA |
| <i>HvMpc1-H3-PLP</i> | TCCATGCAAC | CGAGAGTCCA | GGTCCTGCGC | CCCAACACGC | TACGCCTAGA | GGAGTCGCCA | CCGCTATCTG | TCCAGACCAG | GTGGGAGAGA | TCGTAGGGGG | CCTAACGAGC | TGAAGTATTG | GATCCGGGTA |
| <i>HvMpc1-H3-DOM</i> | TCCATGCAAC | CGAGAGTCCA | GGTCCTGCGC | CCCAACACGC | TACGCCTGGA | ATAGTCGCCA | CCGCTATCTT | TCCAGACCAG | GTGCGAGAGA | TCGTAGGGGA | CCTAACGAGC | TGAAGTATTG | GATCCGGGTA |
| <i>HvMpc1-H3-REC</i> | TCCATGCAAC | CGAGAGTCCA | GGTCCTGCGC | CCCAACACGC | TACGCCTAGA | GGAGTCGCCA | CCGCTATCTT | TCCAGACCAG | GTGCGAGAGA | TCGTAGGGGG | CCTAACGAGC | TGAAGTATTG | GATCCGGGTA |
|                      | 261        |            |            |            |            |            |            |            |            |            |            |            | 390        |
| <i>HvMpc1-H3-BW</i>  | TATAAGACTT | GGACGGATAT | CATCATTAGT | GCAAGTGGAG | ATGTATAGGC | GGCGGAACGG | CGGTGCTGGA | CGTCCGTGTT | CATTACACGG | ATGGATCCTT | GCTAGGCGTT | TGGTGTACCT | AATTCGGACT |
| <i>HvMpc1-H3-BA</i>  | TATAAGACTT | GGACGGATAT | CATCATTAGT | GCAAGTGGAG | ATGTATAGGC | GGCGGAACGG | CGGTGCTGGA | CGTCCGTGTT | CATTACACGG | ATGGATCCTT | GCTAGGCGTT | TGGTGTACCT | AATTCGGACT |
| <i>HvMpc1-H3-PLP</i> | TATAAGACTT | GGACGGATAT | CATCATTAGT | GCAAGTGGAG | ATGTATAGGC | GGCGGAACGG | CGGTGCTGGA | CGTCCGTGTT | CATTACACGG | ATGGATCCTT | GCTAGGCGTT | TGGTGTACCT | AATTCGGACT |
| <i>HvMpc1-H3-DOM</i> | TATAAGACTT | GGACGGATAT | CATCATTAGT | GCAAGTGGAG | ATGTATAGGC | GGCGGAACGG | CGGTGCTGGA | CGTCCGTGTT | CATTACACGG | ATGGATCCTT | GCTAGGCGTT | TGGTGTACCT | AATTCGGACT |
| <i>HvMpc1-H3-REC</i> | TATAAGACTT | GGACGGATAT | CATCATTAGT | GCAAGTGGAG | ATGTATAGGC | GGCGGAACGG | CGGTGCTGGA | CGTCCGTGTT | CATTACACGG | ATGGATCCTT | GCTAGGCGTT | TGGTGTACCT | AATTCGGACT |
|                      | 391        |            |            |            |            |            |            |            |            |            |            |            | 494        |
| <i>HvMpc1-H3-BW</i>  | TAGGCGGTGC | CCACATGGTG | TGTTAATAAA | GCACACCGGC | AACCTGCCCA | CGGACCCAAA | CACAGCACAC | ACAGGCAGTG | GGGAAAAGAG | ATGAGATGGG | GAGG       |            |            |
| <i>HvMpc1-H3-BA</i>  | TAGGCGGTGC | CCACATGGTG | TGTTAATAAA | GCACACCGGC | AACCTGCCCA | CGGACCCAAA | CACAGCACAC | ACAGGCAGTG | GGGAAAAGAG | ATGAGATGGG | GAGG       |            |            |
| <i>HvMpc1-H3-PLP</i> | TAGGCGGTGC | CCACATGGTG | TGTTAATAAA | GCACACCGGC | AACCTGCCCA | CGGACCCAAA | CACAGCACAC | ACAGGCAGTG | GGGAAAAGAG | ATGAGATGGG | GAGG       |            |            |
| <i>HvMpc1-H3-DOM</i> | TAGGCGGTGC | CCACATGGTG | TGTTAATAAA | GCACACCGGC | AACCTGCCCA | CGGACCCAAA | CACAGCACAC | ACAGGCAGTG | GGGAAAAGAG | ATGAGATGAG | GAGG       |            |            |
| <i>HvMpc1-H3-REC</i> | TAGGCGGTGC | CCACATGGTG | TGTTAATAAA | GCACACCGGC | AACCTGCCCA | CGGACCCAAA | CACAGCACAC | ACAGGCAGTG | GGGAAAAGAG | ATGAGATGGG | GAGG       |            |            |
