# Supplementary material for: Structural and functional divergence of the Mpc1 genes in wheat and barley
Source: PubMed Central journal article supplement (PMC6391766; doi:10.1186/s12862-019-1378-3), 2019-02-26
Supplement: 12862_2019_1378_MOESM2_ESM.pdf [file 12862_2019_1378_MOESM2_ESM.pdf]

**Additional file 2. Putative cis-acting regulatory elements identified in the *Mpc1* promoters. Promoter analysis was performed using New PLACE database. “+” – coding strand, “-” – template strand.**

**>promoter\_TaMpc1-A2**

```
TTGAGAAAAATATTAATATTTAAAAATAAAAAATACATTTGTATTTTTATGATATTTTTTAAAAAAACCAACTGAAAATCGTAAAATTAGAGAC  
TTCGAGAAAAAACAAATTGACAACTGCAGGGAGCCGATGAAAGACAAAATGGGCCGCGCCATATTGTGAGCGCTTGGACAACGATCCATA  
GGACTTGTGCATAGAAAATTGGCTGCATCCGAGCTGCCGGCGATGTATGACGGCGAAGAACGCGCCGCTGTGCATCCCGATTTCATTGA  
ACACATTGGAGCTTTTCCTAGCCTTTTTGGTCCATCTACCTCTAGAGAGAAGTGTCGATCACGATGACCATGGCTGAGGGTGCTAAGCAGGT  
CCACGTAGACGCGCTACTGTACAATGCTTAACAGGTCCACGTAGACGCTCTGCTGTACACTGCTCAACGGGGCCACGTAGACGCGCCTA  
TGAATAAATACGGCTACAGCCCTGCTGCCACAGATGACAGACCCCCCCCCCCCCCTCTCTCTCTCTCTCTTAACACAATACACAC  
CGGAGATGAGGTGAGATAGAGAGGTTAGTTTCAGAGAAGAGGAAGGAAGATAGAGAGGGGAGAGA
```

| Factor or Site Name | Loc. (Str.)     | Signal Sequence | SITE #         |
|---------------------|-----------------|-----------------|----------------|
| GT1CONSENSUS        | 5 (+) GRWAAW    |                 | <u>S000198</u> |
| MYCCONSENSUSAT      | 33 (-) CANNTG   |                 | <u>S000407</u> |
| MYCCONSENSUSAT      | 33 (+) CANNTG   |                 | <u>S000407</u> |
| GATABOX             | 47 (+) GATA     |                 | <u>S000039</u> |
| MYB1AT              | 60 (+) WAACCA   |                 | <u>S000408</u> |
| MYCCONSENSUSAT      | 64 (-) CANNTG   |                 | <u>S000407</u> |
| MYCCONSENSUSAT      | 64 (+) CANNTG   |                 | <u>S000407</u> |
| MYB2CONSENSUSAT     | 64 (+) YAACKG   |                 | <u>S000409</u> |
| GT1CONSENSUS        | 69 (+) GRWAAW   |                 | <u>S000198</u> |
| GT1CONSENSUS        | 95 (+) GRWAAW   |                 | <u>S000198</u> |
| MYCCONSENSUSAT      | 103 (-) CANNTG  |                 | <u>S000407</u> |
| CAATBOX1            | 103 (+) CAAT    |                 | <u>S000028</u> |
| MYCCONSENSUSAT      | 103 (+) CANNTG  |                 | <u>S000407</u> |
| CAATBOX1            | 105 (-) CAAT    |                 | <u>S000028</u> |
| WRKY71OS            | 107 (+) TGAC    |                 | <u>S000447</u> |
| MYCCONSENSUSAT      | 110 (-) CANNTG  |                 | <u>S000407</u> |
| MYCCONSENSUSAT      | 110 (+) CANNTG  |                 | <u>S000407</u> |
| MYB2CONSENSUSAT     | 110 (+) YAACKG  |                 | <u>S000409</u> |
| DOFCOREZM           | 129 (+) AAAG    |                 | <u>S000265</u> |
| MYCCONSENSUSAT      | 134 (-) CANNTG  |                 | <u>S000407</u> |
| MYCCONSENSUSAT      | 134 (+) CANNTG  |                 | <u>S000407</u> |
| SORLIP2AT           | 139 (+) GGGCC   |                 | <u>S000483</u> |
| SORLIP2AT           | 144 (-) GGGCC   |                 | <u>S000483</u> |
| CAATBOX1            | 151 (-) CAAT    |                 | <u>S000028</u> |
| WRKY71OS            | 185 (-) TGAC    |                 | <u>S000447</u> |
| WRKY71OS            | 225 (+) TGAC    |                 | <u>S000447</u> |
| MYBCOREATCYCB1      | 237 (+) AACGG   |                 | <u>S000502</u> |
| CGCGBOXAT           | 242 (-) VCGCGB  |                 | <u>S000501</u> |
| CGCGBOXAT           | 242 (+) VCGCGB  |                 | <u>S000501</u> |
| CAATBOX1            | 263 (-) CAAT    |                 | <u>S000028</u> |
| MYCCONSENSUSAT      | 269 (-) CANNTG  |                 | <u>S000407</u> |
| MYCCONSENSUSAT      | 269 (+) CANNTG  |                 | <u>S000407</u> |
| DOFCOREZM           | 278 (-) AAAG    |                 | <u>S000265</u> |
| DOFCOREZM           | 288 (-) AAAG    |                 | <u>S000265</u> |
| CBFHV               | 318 (-) RYCGAC  |                 | <u>S000497</u> |
| WRKY71OS            | 329 (+) TGAC    |                 | <u>S000447</u> |
| CGCGBOXAT           | 365 (-) VCGCGB  |                 | <u>S000501</u> |
| CGCGBOXAT           | 365 (+) VCGCGB  |                 | <u>S000501</u> |
| CAATBOX1            | 378 (+) CAAT    |                 | <u>S000028</u> |
| MYBCORE             | 385 (-) CNGTTR  |                 | <u>S000176</u> |
| MYB2CONSENSUSAT     | 421 (+) YAACKG  |                 | <u>S000409</u> |
| SORLIP2AT           | 426 (+) GGGCC   |                 | <u>S000483</u> |
| BOXIIPCCHS          | 428 (-) ACGTGGC |                 | <u>S000229</u> |
| SORLIP1AT           | 428 (+) GCCAC   |                 | <u>S000482</u> |
| CGCGBOXAT           | 437 (-) VCGCGB  |                 | <u>S000501</u> |
| CGCGBOXAT           | 437 (+) VCGCGB  |                 | <u>S000501</u> |
| MYCCONSENSUSAT      | 477 (-) CANNTG  |                 | <u>S000407</u> |
| MYCCONSENSUSAT      | 477 (+) CANNTG  |                 | <u>S000407</u> |
| WRKY71OS            | 481 (+) TGAC    |                 | <u>S000447</u> |
| CAATBOX1            | 525 (+) CAAT    |                 | <u>S000028</u> |
| GATABOX             | 549 (+) GATA    |                 | <u>S000039</u> |
| MYB1LEPR            | 558 (+) GTTAGTT |                 | <u>S000443</u> |
| DOFCOREZM           | 570 (+) AAAG    |                 | <u>S000265</u> |

>promoter\_TaMpc1-B2

GAGTTGACGGACGAAATCCACGCTTATCAATTTGTGCGAGGGACCAAAAAATAGACTTTTCTCATTAGTAAAAGCTCAACCTTCTCTCAGC  
ATCTGGTGGGAAGGAACCTTGCCATGCCTCTGAGGCCTCGAGCACCCGCAACTTCCGGGGAGTCGACTGGCAGCATGTCCCTCTTCTAA  
TAGTAAATGTTTCGTGTTTCCCCCACCTAGACATACAAATGCAACGATTCTTAGGACTGTGCACAGAAATATGACATCAATCAAACCTG  
CCGGCGAAGAAACGGCCGCGCTGCGCATCCCGATTTCATTGCACACATGGAGCTTTCCCTTGCCTTTTGTGCCATCCACCTCTAGAGAGAA  
GTGTCGATCACGATAACCATGGCTGAGGGTGCTAAGCAGGTCCACGTAGACGCGCTATTGTACAATGCTAAACAGGTCCACGTAGCCGC  
GCTGCTGTACAATGCTGAACGGGGCCACGTAGACGCGCTGATGTATATAAAATACGGCAACAATCCTGCCGCCACAGATGAGATGACAT  
AGAGAGAGGTTGCCTCAGAAGAAAGAGGAAGATAGAAAGAGAGAGAGAGAGAGAGAGAGAGAGAGAGAGA

| Factor or Site Name | Loc. (Str.)      | Signal Sequence | SITE #         |
|---------------------|------------------|-----------------|----------------|
| WBOXATNPR1          | 4 (+) TTGAC      |                 | <u>S000390</u> |
| WRKY71OS            | 5 (+) TGAC       |                 | <u>S000447</u> |
| IBOX                | 23 (-) GATAAG    |                 | <u>S000124</u> |
| GATABOX             | 25 (-) GATA      |                 | <u>S000039</u> |
| CAATBOX1            | 28 (+) CAAT      |                 | <u>S000028</u> |
| DOFCOREZM           | 54 (-) AAAG      |                 | <u>S000265</u> |
| DOFCOREZM           | 69 (+) AAAG      |                 | <u>S000265</u> |
| MYCCONSENSUSAT      | 89 (-) CANNTG    |                 | <u>S000407</u> |
| MYCCONSENSUSAT      | 89 (+) CANNTG    |                 | <u>S000407</u> |
| CBFHV               | 151 (-) RYCGAC   |                 | <u>S000497</u> |
| CBFHV               | 151 (+) RYCGAC   |                 | <u>S000497</u> |
| E2FCONSENSUS        | 194 (+) WTTSSCSS |                 | <u>S000476</u> |
| MYCCONSENSUSAT      | 214 (-) CANNTG   |                 | <u>S000407</u> |
| MYCCONSENSUSAT      | 214 (+) CANNTG   |                 | <u>S000407</u> |
| WRKY71OS            | 238 (-) TGAC     |                 | <u>S000447</u> |
| WRKY71OS            | 250 (+) TGAC     |                 | <u>S000447</u> |
| CAATBOX1            | 256 (+) CAAT     |                 | <u>S000028</u> |
| MYBCOREATCYCB1      | 278 (+) AACGG    |                 | <u>S000502</u> |
| CGCGBOXAT           | 283 (-) VCGCGB   |                 | <u>S000501</u> |
| CGCGBOXAT           | 283 (+) VCGCGB   |                 | <u>S000501</u> |
| CAATBOX1            | 304 (-) CAAT     |                 | <u>S000028</u> |
| MYCCONSENSUSAT      | 310 (-) CANNTG   |                 | <u>S000407</u> |
| MYCCONSENSUSAT      | 310 (+) CANNTG   |                 | <u>S000407</u> |
| DOFCOREZM           | 319 (-) AAAG     |                 | <u>S000265</u> |
| DOFCOREZM           | 329 (-) AAAG     |                 | <u>S000265</u> |
| CBFHV               | 359 (-) RYCGAC   |                 | <u>S000497</u> |
| GATABOX             | 368 (+) GATA     |                 | <u>S000039</u> |
| IBOXCORE            | 368 (+) GATAA    |                 | <u>S000199</u> |
| MYB1AT              | 370 (+) WAACCA   |                 | <u>S000408</u> |
| CGCGBOXAT           | 406 (-) VCGCGB   |                 | <u>S000501</u> |
| CGCGBOXAT           | 406 (+) VCGCGB   |                 | <u>S000501</u> |
| CAATBOX1            | 413 (-) CAAT     |                 | <u>S000028</u> |
| CAATBOX1            | 419 (+) CAAT     |                 | <u>S000028</u> |
| CGCGBOXAT           | 442 (-) VCGCGB   |                 | <u>S000501</u> |
| CGCGBOXAT           | 442 (+) VCGCGB   |                 | <u>S000501</u> |
| CAATBOX1            | 455 (+) CAAT     |                 | <u>S000028</u> |
| MYBCOREATCYCB1      | 463 (+) AACGG    |                 | <u>S000502</u> |
| SORLIP2AT           | 467 (+) GGGCC    |                 | <u>S000483</u> |
| BOXIIPCHS           | 469 (-) ACGTGGC  |                 | <u>S000229</u> |
| SORLIP1AT           | 469 (+) GCCAC    |                 | <u>S000482</u> |
| CGCGBOXAT           | 478 (-) VCGCGB   |                 | <u>S000501</u> |
| CGCGBOXAT           | 478 (+) VCGCGB   |                 | <u>S000501</u> |
| CAATBOX1            | 505 (+) CAAT     |                 | <u>S000028</u> |
| MYCCONSENSUSAT      | 520 (-) CANNTG   |                 | <u>S000407</u> |
| MYCCONSENSUSAT      | 520 (+) CANNTG   |                 | <u>S000407</u> |
| WRKY71OS            | 529 (+) TGAC     |                 | <u>S000447</u> |
| DOFCOREZM           | 556 (+) AAAG     |                 | <u>S000265</u> |
| GATABOX             | 565 (+) GATA     |                 | <u>S000039</u> |
| DOFCOREZM           | 570 (+) AAAG     |                 | <u>S000265</u> |

**>promoter\_TaMpc1-D2**

CCATCTGTGAAAAATGACGCGGCAATGCGTGCGGGAGCCGCTAGTAAAATTAANTGAGAAAAACACTCCATCTGTGAAAAATGACGCG  
GCAATGCGGTGCGGGAGCCGCTAGTAAACATTAATGACGGGATTAAATGCTGGTGTTCCTCCACCTGGACATAAAAAACGCAACGATCCA  
TAGGACTTGTACAGAAATTTGGCTGCGTCAGGGCTGCCGGCGATATTATGACGGCGAAGAAACGGCCGCAGTACATCCCCGATTTAT  
TGCACACATGGAGCTTTCATAGCCTTTTGCCCATCTACCTCTAGAGAGAAGTGTGATCACGATGACCATGGGTTGAGGGTGCTAAGC  
AGGTCCACGTAGACGCGCTACTGTACAATGCTTAATAGGTCCACGTAGACGCTCTCCTGTACAACGCTGAACAGGGCCACGTAGACCCG  
CTGCTGAATAAGTACGGCAACAACCTGCTGCCACAGATGACAGACCCCTCTACTCTCTCTCTCTCTCTAACAACAACACATACT  
GGAGATGAGATGAGATAAGAGAGGTTAGTTTCAGAGAAAAGAGGAAGAGGAAGATAGAGAGGGAGAGA

| <b>Factor or Site Name</b> | <b>Loc. (Str.)</b> | <b>Signal Sequence</b> | <b>SITE #</b>  |
|----------------------------|--------------------|------------------------|----------------|
| MYCCONSENSUSAT             | 2 (-) CANNTG       |                        | <u>S000407</u> |
| MYCCONSENSUSAT             | 2 (+) CANNTG       |                        | <u>S000407</u> |
| GT1CONSENSUS               | 9 (+) GRWAAW       |                        | <u>S000198</u> |
| WRKY71OS                   | 15 (+) TGAC        |                        | <u>S000447</u> |
| CGCGBOXAT                  | 17 (-) VCGCGB      |                        | <u>S000501</u> |
| CGCGBOXAT                  | 17 (+) VCGCGB      |                        | <u>S000501</u> |
| E2FCONSENSUS               | 19 (-) WTTSSCSS    |                        | <u>S000476</u> |
| CAATBOX1                   | 23 (+) CAAT        |                        | <u>S000028</u> |
| GT1CONSENSUS               | 58 (+) GRWAAW      |                        | <u>S000198</u> |
| GT1CONSENSUS               | 59 (+) GRWAAW      |                        | <u>S000198</u> |
| MYCCONSENSUSAT             | 70 (-) CANNTG      |                        | <u>S000407</u> |
| MYCCONSENSUSAT             | 70 (+) CANNTG      |                        | <u>S000407</u> |
| GT1CONSENSUS               | 77 (+) GRWAAW      |                        | <u>S000198</u> |
| WRKY71OS                   | 83 (+) TGAC        |                        | <u>S000447</u> |
| CGCGBOXAT                  | 85 (-) VCGCGB      |                        | <u>S000501</u> |
| CGCGBOXAT                  | 85 (+) VCGCGB      |                        | <u>S000501</u> |
| E2FCONSENSUS               | 87 (-) WTTSSCSS    |                        | <u>S000476</u> |
| CAATBOX1                   | 91 (+) CAAT        |                        | <u>S000028</u> |
| WRKY71OS                   | 122 (+) TGAC       |                        | <u>S000447</u> |
| MYCCONSENSUSAT             | 151 (-) CANNTG     |                        | <u>S000407</u> |
| MYCCONSENSUSAT             | 151 (+) CANNTG     |                        | <u>S000407</u> |
| WRKY71OS                   | 187 (-) TGAC       |                        | <u>S000447</u> |
| WRKY71OS                   | 206 (-) TGAC       |                        | <u>S000447</u> |
| GATABOX                    | 221 (+) GATA       |                        | <u>S000039</u> |
| WRKY71OS                   | 228 (+) TGAC       |                        | <u>S000447</u> |
| MYBCOREATCYCB1             | 240 (+) AACGG      |                        | <u>S000502</u> |
| CGCGBOXAT                  | 245 (-) VCGCGB     |                        | <u>S000501</u> |
| CGCGBOXAT                  | 245 (+) VCGCGB     |                        | <u>S000501</u> |
| CAATBOX1                   | 266 (-) CAAT       |                        | <u>S000028</u> |
| MYCCONSENSUSAT             | 272 (-) CANNTG     |                        | <u>S000407</u> |
| MYCCONSENSUSAT             | 272 (+) CANNTG     |                        | <u>S000407</u> |
| DOFCOREZM                  | 281 (-) AAAG       |                        | <u>S000265</u> |
| DOFCOREZM                  | 291 (-) AAAG       |                        | <u>S000265</u> |
| E2FCONSENSUS               | 293 (+) WTTSSCSS   |                        | <u>S000476</u> |
| SORLIP2AT                  | 296 (-) GGGCC      |                        | <u>S000483</u> |
| CBFHV                      | 321 (-) RYCGAC     |                        | <u>S000497</u> |
| WRKY71OS                   | 332 (+) TGAC       |                        | <u>S000447</u> |
| WBOXNTERF3                 | 332 (+) TGACY      |                        | <u>S000457</u> |
| CGCGBOXAT                  | 369 (-) VCGCGB     |                        | <u>S000501</u> |
| CGCGBOXAT                  | 369 (+) VCGCGB     |                        | <u>S000501</u> |
| CAATBOX1                   | 382 (+) CAAT       |                        | <u>S000028</u> |
| SORLIP2AT                  | 430 (+) GGGCC      |                        | <u>S000483</u> |
| BOXIIPCCHS                 | 432 (-) ACGTGGC    |                        | <u>S000229</u> |
| SORLIPIAT                  | 432 (+) GCCAC      |                        | <u>S000482</u> |
| MYCCONSENSUSAT             | 481 (-) CANNTG     |                        | <u>S000407</u> |
| MYCCONSENSUSAT             | 481 (+) CANNTG     |                        | <u>S000407</u> |
| WRKY71OS                   | 485 (+) TGAC       |                        | <u>S000447</u> |
| SORLIP5AT                  | 498 (-) GAGTGAG    |                        | <u>S000486</u> |
| GATABOX                    | 548 (+) GATA       |                        | <u>S000039</u> |
| IBOX                       | 548 (+) GATAAG     |                        | <u>S000124</u> |
| MYB1LEPR                   | 558 (+) GTTAGTT    |                        | <u>S000443</u> |
| DOFCOREZM                  | 570 (+) AAAG       |                        | <u>S000265</u> |
| GATABOX                    | 585 (+) GATA       |                        | <u>S000039</u> |

>promoter\_TaMpc1-D3

TGGTTTAGCTTTAGCCCTAGGCTTCGAGAAAATCCTGGCTCCGTCCTCTGTTTTACACGTTCCCTACTTTTCAACAATTTATAGATATTATG  
ACCAAAGGCTTACCTACGGCGTCATTTGAGGAGTTCGGGTACAGTCTTTGCGTCAGCCGCGGTGCCGCTTCGACTGCGGGGGTGTGA  
GTATATGTGTTATGTGTATATTGTGTATTGGGCCCGCCTCATAGTTCCTTATATAGTTGAGGTCGGTGACCCACCGTTGTACATCATAT  
ATATGTGCCATGCACGAGAGCAATACATCGTGCAATCATAGTCTCATACTAGCGATCTGAAGCTTTACACCAGTTATAGGTTTTTC  
TTCTCGACTTTGGACGGATATCATCATCGGTGCCGCCAGTGAGATGTATAGGCGGGGAACGGCGGTGCTGAACGTCGGTGTTCATG  
CACAGATGGATCCTTTGCTAGCCGTTTGGTGTACCTAACTCGGACTTAGGTGTTGCTTGCGGTGACCACATGGTGTATTAATAAAGCAC  
AACGGCCTTCTGCCACGGATCAAACACAGTACACACGGGCGAGTTGGGAAAAAGATAACGGGGAGG

| Factor or Site Name | Loc. (Str.)    | Signal Sequence | SITE #         |
|---------------------|----------------|-----------------|----------------|
| MYB1AT              | 1 (-) WAACCA   |                 | <u>S000408</u> |
| DOFCOREZM           | 9 (-) AAAG     |                 | <u>S000265</u> |
| DOFCOREZM           | 64 (-) AAAG    |                 | <u>S000265</u> |
| CAATBOX1            | 72 (+) CAAT    |                 | <u>S000028</u> |
| GATABOX             | 81 (+) GATA    |                 | <u>S000039</u> |
| WRKY71OS            | 88 (+) TGAC    |                 | <u>S000447</u> |
| WBOXNTERF3          | 88 (+) TGACY   |                 | <u>S000457</u> |
| DOFCOREZM           | 93 (+) AAAG    |                 | <u>S000265</u> |
| WRKY71OS            | 110 (-) TGAC   |                 | <u>S000447</u> |
| MYCCONSENSUSAT      | 112 (-) CANNTG |                 | <u>S000407</u> |
| MYCCONSENSUSAT      | 112 (+) CANNTG |                 | <u>S000407</u> |
| DOFCOREZM           | 135 (-) AAAG   |                 | <u>S000265</u> |
| WRKY71OS            | 141 (-) TGAC   |                 | <u>S000447</u> |
| CGCGBOXAT           | 146 (-) VCGCGB |                 | <u>S000501</u> |
| CGCGBOXAT           | 146 (+) VCGCGB |                 | <u>S000501</u> |
| CAATBOX1            | 198 (-) CAAT   |                 | <u>S000028</u> |
| CAATBOX1            | 205 (-) CAAT   |                 | <u>S000028</u> |
| SORLIP2AT           | 208 (+) GGGCC  |                 | <u>S000483</u> |
| SORLIP2AT           | 209 (-) GGGCC  |                 | <u>S000483</u> |
| WRKY71OS            | 245 (+) TGAC   |                 | <u>S000447</u> |
| WBOXNTERF3          | 245 (+) TGACY  |                 | <u>S000457</u> |
| MYB2CONSENSUSAT     | 252 (-) YAACKG |                 | <u>S000409</u> |
| CAATBOX1            | 289 (+) CAAT   |                 | <u>S000028</u> |
| CAATBOX1            | 301 (+) CAAT   |                 | <u>S000028</u> |
| DOFCOREZM           | 333 (-) AAAG   |                 | <u>S000265</u> |
| DOFCOREZM           | 365 (-) AAAG   |                 | <u>S000265</u> |
| MYBST1              | 373 (+) GGATA  |                 | <u>S000180</u> |
| GATABOX             | 374 (+) GATA   |                 | <u>S000039</u> |
| GATABOX             | 376 (-) GATA   |                 | <u>S000039</u> |
| MYBCOREATCYCB1      | 416 (+) AACGG  |                 | <u>S000502</u> |
| CAATBOX1            | 442 (-) CAAT   |                 | <u>S000028</u> |
| MYCCONSENSUSAT      | 448 (-) CANNTG |                 | <u>S000407</u> |
| MYCCONSENSUSAT      | 448 (+) CANNTG |                 | <u>S000407</u> |
| DOFCOREZM           | 458 (-) AAAG   |                 | <u>S000265</u> |
| MYBCOREATCYCB1      | 467 (-) AACGG  |                 | <u>S000502</u> |
| WRKY71OS            | 508 (+) TGAC   |                 | <u>S000447</u> |
| WBOXNTERF3          | 508 (+) TGACY  |                 | <u>S000457</u> |
| MYCCONSENSUSAT      | 512 (-) CANNTG |                 | <u>S000407</u> |
| MYCCONSENSUSAT      | 512 (+) CANNTG |                 | <u>S000407</u> |
| DOFCOREZM           | 528 (+) AAAG   |                 | <u>S000265</u> |
| MYB2CONSENSUSAT     | 534 (+) YAACKG |                 | <u>S000409</u> |
| MYCCONSENSUSAT      | 575 (-) CANNTG |                 | <u>S000407</u> |
| MYB2CONSENSUSAT     | 575 (-) YAACKG |                 | <u>S000409</u> |
| MYCCONSENSUSAT      | 575 (+) CANNTG |                 | <u>S000407</u> |
| GT1CONSENSUS        | 581 (+) GRWAAW |                 | <u>S000198</u> |
| GT1CONSENSUS        | 582 (+) GRWAAW |                 | <u>S000198</u> |
| DOFCOREZM           | 585 (+) AAAG   |                 | <u>S000265</u> |
| GATABOX             | 588 (+) GATA   |                 | <u>S000039</u> |
| IBOXCORE            | 588 (+) GATAA  |                 | <u>S000199</u> |
| MYB2CONSENSUSAT     | 590 (+) YAACKG |                 | <u>S000409</u> |

**>promoter\_TaMpc1-D4**

GGCTATGCCGTAGGCATACCTCTGCCATAGATATGCCGACGGCCGGGTTACCTCCCGTCGGCGTAGTTTCAACGCCGTCAAACGGTCA  
 GCACATAACCGGTTAGGTTGGCCCCGGTCTATGCCGACGACCGCCCTATGCCGACGGTCTCCGTAGGGGTATTTTCGAGCGGTCCCGACGG  
 CCTCGTCTGTGCCGACGGCCCCGTGCGCATAGATGGATGTATGCTGACGGCTTTTTCTACGCTACGGCTGTCTTTGGCCGTGCGCATA  
 GGCCCATCTATGCCGACGGGGGCCGTGCGCATAGAGAGGGCCGTGCGCGCAAGCAGTTATTCTGGTAGTGAAAAACGGCCGGCTGTTC  
 ATTGCACAGATGGAGTCTTCTAGCCTTTTGATCCATCTAACTCTGAGATAAGTGTGCTCACGATGCCCGTGGGTTGAGGGTGCAAAG  
 CATGTCCACGTAGACGCGCTACTGTACAATGATAACAGGTCCACGTTGACGCGCTGGTGAATAAATACGGCAACAACCCCGCTGCCCGC  
 AGATGACAGACCCTCGCTCACTCGCTCTTAACACAACACCCACTGGAGAGAGAGAGAGAGAGA

| <b>Factor or Site Name</b> | <b>Loc. (Str.)</b> | <b>Signal Sequence</b> | <b>SITE #</b> |
|----------------------------|--------------------|------------------------|---------------|
| GATABOX                    | 30 (+)             | GATA                   | S000039       |
| DRERTCOREAT                | 35 (+)             | RCCGAC                 | S000418       |
| CGCGBOXAT                  | 43 (-)             | VCGCGB                 | S000501       |
| CGCGBOXAT                  | 43 (+)             | VCGCGB                 | S000501       |
| MYBCORE                    | 46 (+)             | CNGTTR                 | S000176       |
| DRERTCOREAT                | 58 (-)             | RCCGAC                 | S000418       |
| WRKY71OS                   | 78 (-)             | TGAC                   | S000447       |
| MYBCOREATCYCB1             | 82 (+)             | AACGG                  | S000502       |
| WRKY71OS                   | 86 (-)             | TGAC                   | S000447       |
| MYBCORE                    | 94 (-)             | CNGTTR                 | S000176       |
| MYBPZM                     | 100 (-)            | CCWACC                 | S000179       |
| MYBPZM                     | 104 (-)            | CCWACC                 | S000179       |
| SORLIP2AT                  | 108 (-)            | GGGCC                  | S000483       |
| DRERTCOREAT                | 120 (+)            | RCCGAC                 | S000418       |
| CGCGBOXAT                  | 128 (-)            | VCGCGB                 | S000501       |
| CGCGBOXAT                  | 128 (+)            | VCGCGB                 | S000501       |
| DRERTCOREAT                | 138 (+)            | RCCGAC                 | S000418       |
| DRERTCOREAT                | 189 (+)            | RCCGAC                 | S000418       |
| SORLIP2AT                  | 195 (-)            | GGGCC                  | S000483       |
| DRERTCOREAT                | 201 (-)            | RCCGAC                 | S000418       |
| WRKY71OS                   | 223 (+)            | TGAC                   | S000447       |
| DOFCOREZM                  | 229 (-)            | AAAG                   | S000265       |
| DRERTCOREAT                | 259 (-)            | RCCGAC                 | S000418       |
| SORLIP2AT                  | 268 (-)            | GGGCC                  | S000483       |
| DRERTCOREAT                | 279 (+)            | RCCGAC                 | S000418       |
| SORLIP2AT                  | 287 (+)            | GGGCC                  | S000483       |
| DRERTCOREAT                | 292 (-)            | RCCGAC                 | S000418       |
| DRERTCOREAT                | 310 (-)            | RCCGAC                 | S000418       |
| MYB2CONSENSUSAT            | 321 (-)            | YAACKG                 | S000409       |
| MYBCORE                    | 321 (+)            | CNGTTR                 | S000176       |
| GT1CONSENSUS               | 337 (+)            | GRWAAW                 | S000198       |
| MYBCOREATCYCB1             | 341 (+)            | AACGG                  | S000502       |
| CGCGBOXAT                  | 346 (-)            | VCGCGB                 | S000501       |
| CGCGBOXAT                  | 346 (+)            | VCGCGB                 | S000501       |
| CAATBOX1                   | 357 (-)            | CAAT                   | S000028       |
| MYCCONSUSAT                | 363 (-)            | CANNTG                 | S000407       |
| MYCCONSUSAT                | 363 (+)            | CANNTG                 | S000407       |
| DOFCOREZM                  | 382 (-)            | AAAG                   | S000265       |
| GATABOX                    | 404 (+)            | GATA                   | S000039       |
| IBOX                       | 404 (+)            | GATAAG                 | S000124       |
| DOFCOREZM                  | 442 (+)            | AAAG                   | S000265       |
| CGCGBOXAT                  | 459 (-)            | VCGCGB                 | S000501       |
| CGCGBOXAT                  | 459 (+)            | VCGCGB                 | S000501       |
| CAATBOX1                   | 472 (+)            | CAAT                   | S000028       |
| GATABOX                    | 476 (+)            | GATA                   | S000039       |
| IBOXCORE                   | 476 (+)            | GATAA                  | S000199       |
| MYBCORE                    | 478 (-)            | CNGTTR                 | S000176       |
| BP5OSWX                    | 487 (-)            | CAACGTG                | S000436       |
| WRKY71OS                   | 492 (+)            | TGAC                   | S000447       |
| CGCGBOXAT                  | 494 (-)            | VCGCGB                 | S000501       |
| CGCGBOXAT                  | 494 (+)            | VCGCGB                 | S000501       |
| MYCCONSUSAT                | 534 (-)            | CANNTG                 | S000407       |
| MYCCONSUSAT                | 534 (+)            | CANNTG                 | S000407       |
| WRKY71OS                   | 538 (+)            | TGAC                   | S000447       |
| SORLIP5AT                  | 551 (-)            | GAGTGAG                | S000486       |

>promoter\_HvMpc1-H2

ATGTTTGAATATAGTTACATGACACATAATTCCACAACGGGTGGGATGCTCCCTCCATGCTCACACACATCTGGGATGCCCCCTTCGG  
TTTTGGGGGGTCCGGGTGCCTCGTGCTGACACAGGTGAGCCGTGAGCAAAGCTACGTGCTCTGGCTTCTTTGGACTCAAAGGGCAAC  
GATCCTTTTCAGTTGTCAAAGAAATACGACATAGTACATCTCACCTGCCGGCGATCTTGACGGCGAAGAAATGGCCGCGCTGTTTAT  
TGGACAAATGGAGCCTTCTAGCCTTTTGGTCCATCTAACTCTGAGATAAGTGTGCTCACGATGACTGTGGATTGAAGGTGCAAAGCA  
GGTCCACGTAGACGCGCTATTGTACAATGCTAAACGGGTCCACGTAGACGCGCTAATGACTAAATACGGCAACAACCTGCTGCCCAA  
GATGACGGACCCTCACTCTCTGCTCTCTAACACAACAACAACACACACCGGAGAAGA

| Factor or Site Name | Loc. (Str.)        | Signal Sequence | SITE #         |
|---------------------|--------------------|-----------------|----------------|
| BIHD1OS             | 20 (-) TGTC A      |                 | <u>S000498</u> |
| WRKY71OS            | 20 (+) TGAC        |                 | <u>S000447</u> |
| MYB2CONSENSUSAT     | 35 (+) YAACKG      |                 | <u>S000409</u> |
| MYCCONSUSAT         | 68 (-) CANNTG      |                 | <u>S000407</u> |
| MYCCONSUSAT         | 68 (+) CANNTG      |                 | <u>S000407</u> |
| BIHD1OS             | 116 (-) TGTC A     |                 | <u>S000498</u> |
| WRKY71OS            | 116 (+) TGAC       |                 | <u>S000447</u> |
| MYCCONSUSAT         | 121 (-) CANNTG     |                 | <u>S000407</u> |
| MYCCONSUSAT         | 121 (+) CANNTG     |                 | <u>S000407</u> |
| DOFCOREZM           | 139 (+) AAAG       |                 | <u>S000265</u> |
| DOFCOREZM           | 159 (-) AAAG       |                 | <u>S000265</u> |
| DOFCOREZM           | 169 (+) AAAG       |                 | <u>S000265</u> |
| DOFCOREZM           | 183 (-) AAAG       |                 | <u>S000265</u> |
| MYCCONSUSAT         | 188 (-) CANNTG     |                 | <u>S000407</u> |
| MYB2CONSENSUSAT     | 188 (-) YAACKG     |                 | <u>S000409</u> |
| MYCCONSUSAT         | 188 (+) CANNTG     |                 | <u>S000407</u> |
| BIHD1OS             | 192 (+) TGTC A     |                 | <u>S000498</u> |
| WRKY71OS            | 193 (-) TGAC       |                 | <u>S000447</u> |
| DOFCOREZM           | 197 (+) AAAG       |                 | <u>S000265</u> |
| MYCCONSUSAT         | 221 (-) CANNTG     |                 | <u>S000407</u> |
| MYCCONSUSAT         | 221 (+) CANNTG     |                 | <u>S000407</u> |
| CAATBOX1            | 266 (-) CAAT       |                 | <u>S000028</u> |
| MYCCONSUSAT         | 272 (-) CANNTG     |                 | <u>S000407</u> |
| MYCCONSUSAT         | 272 (+) CANNTG     |                 | <u>S000407</u> |
| DOFCOREZM           | 291 (-) AAAG       |                 | <u>S000265</u> |
| IBOX                | 313 (+) GATAAG     |                 | <u>S000124</u> |
| WBOXHVIS01          | 331 (+) TGACT      |                 | <u>S000442</u> |
| WRKY71OS            | 331 (+) TGAC       |                 | <u>S000447</u> |
| WBOXNTERF3          | 331 (+) TGACY      |                 | <u>S000457</u> |
| CAATBOX1            | 340 (-) CAAT       |                 | <u>S000028</u> |
| DOFCOREZM           | 351 (+) AAAG       |                 | <u>S000265</u> |
| OPAQUE2ZM22Z        | 359 (+) TCCACGTAGA |                 | <u>S000017</u> |
| CAATBOX1            | 375 (-) CAAT       |                 | <u>S000028</u> |
| CAATBOX1            | 381 (+) CAAT       |                 | <u>S000028</u> |
| MYBCOREATCYCB1      | 389 (+) AACGG      |                 | <u>S000502</u> |
| OPAQUE2ZM22Z        | 395 (+) TCCACGTAGA |                 | <u>S000017</u> |
| WBOXHVIS01          | 413 (+) TGACT      |                 | <u>S000442</u> |
| DOFCOREZM           | 443 (+) AAAG       |                 | <u>S000265</u> |
| WRKY71OS            | 448 (+) TGAC       |                 | <u>S000447</u> |
| SORLIP5AT           | 457 (-) GAGTGAG    |                 | <u>S000486</u> |

>promoter\_HvMpc1-H3

CCTCTTTTCTACTGGTGCCGGCCAGTTCGCGGGCAGAGGACGCGACCGTTTAAATTCGTTGCATGTCTACGATTCCTTTTTTTTTTATCG  
TCAAATTAATTTCGTCTCGCCTTCCCTCTCGGGCGCCGACTGCACGGACCTGCTGCTATCGAGATAGGACGAGGAGGTTAGCCACGAGGGT  
ATCTGAGACTGGGAGACGAACCACGCGTAGCAGCAGAGCACTAGCTCATGGCCCCGCGCATTCCATGCAACCGAGAGTCCAGGTCCTGCG  
CCCCAACACGCTACGCCTGGAGGAGTCGCCACCGCTATCTTTCCAGACCAGGTGCGAGAGATCGTAGGGGGCCTAACGAGCTGAAGTAT  
TGGATCCGGGTATATAAGACTTGGACGGATATCATCATTAGTGCAAGTGGAGATGTATAGGCGGGGAACGGCGGTGCTGGACGTCCGT  
GTTTCATTACACGGATGGATCCTTGCTAGGCGTTTGGTGTACCTAATTCGGACTTAGGCGGTGCCACATGGTGTGTTAATAAAGCACAC  
CGGCAACCTGCCACGGACCCAAACACAGCACACAGGCACTGGGGAAAAGAGATGAGATGGGGAGG

| Factor or Site Name | Loc. (Str.)      | Signal Sequence | SITE #  |
|---------------------|------------------|-----------------|---------|
| DOFCOREZM           | 4 (-) AAAG       |                 | S000265 |
| CACTFTPPCA1         | 10 (+) YACT      |                 | S000449 |
| MYBCOREATCYCB1      | 46 (-) AACGG     |                 | S000502 |
| DOFCOREZM           | 75 (-) AAAG      |                 | S000265 |
| GT1CONSENSUS        | 83 (-) GRWAAW    |                 | S000198 |
| IBOXCORE            | 84 (-) GATAA     |                 | S000199 |
| GATABOX             | 85 (-) GATA      |                 | S000039 |
| WRKY71OS            | 89 (-) TGAC      |                 | S000447 |
| GATABOX             | 144 (-) GATA     |                 | S000039 |
| GATABOX             | 150 (+) GATA     |                 | S000039 |
| SORLI1P1AT          | 168 (+) GCCAC    |                 | S000482 |
| GATABOX             | 178 (-) GATA     |                 | S000039 |
| CACTFTPPCA1         | 217 (+) YACT     |                 | S000449 |
| SORLI2P2AT          | 228 (-) GGGCC    |                 | S000483 |
| MYBCORE             | 245 (-) CNGTTR   |                 | S000176 |
| SORLI1P1AT          | 295 (+) GCCAC    |                 | S000482 |
| GATABOX             | 303 (-) GATA     |                 | S000039 |
| DOFCOREZM           | 306 (-) AAAG     |                 | S000265 |
| MYCCONSUSAT         | 316 (-) CANNTG   |                 | S000407 |
| MYCCONSUSAT         | 316 (+) CANNTG   |                 | S000407 |
| SORLI2P2AT          | 336 (+) GGGCC    |                 | S000483 |
| CACTFTPPCA1         | 352 (-) YACT     |                 | S000449 |
| CAATBOX1            | 355 (-) CAAT     |                 | S000028 |
| MYBST1              | 383 (+) GGATA    |                 | S000180 |
| GATABOX             | 384 (+) GATA     |                 | S000039 |
| GATABOX             | 386 (-) GATA     |                 | S000039 |
| CACTFTPPCA1         | 396 (-) YACT     |                 | S000449 |
| MYCCONSUSAT         | 400 (-) CANNTG   |                 | S000407 |
| MYCCONSUSAT         | 400 (+) CANNTG   |                 | S000407 |
| CACTFTPPCA1         | 402 (-) YACT     |                 | S000449 |
| MYBCOREATCYCB1      | 424 (+) AACGG    |                 | S000502 |
| MYBPLANT            | 476 (-) MACCWAMC |                 | S000167 |
| MYCCONSUSAT         | 510 (-) CANNTG   |                 | S000407 |
| MYCCONSUSAT         | 510 (+) CANNTG   |                 | S000407 |
| DOFCOREZM           | 526 (+) AAAG     |                 | S000265 |
| CACTFTPPCA1         | 575 (-) YACT     |                 | S000449 |
| GT1CONSENSUS        | 580 (+) GRWAAW   |                 | S000198 |
| DOFCOREZM           | 583 (+) AAAG     |                 | S000265 |
